# Supplementary material for: Superconductivity in functionalized niobium-carbide MXenes
Source: Royal Society of Chemistry journal article supplement (doi:10.1039/d3nr00347g), 2023-01-01
Supplement: d3nr00347g1.pdf [file d3nr00347g1.pdf]

## Supplementary Material Superconductivity in functionalized niobium-carbide MXenes

**Cem Sevik**

E-mail: cem.sevik@uantwerpen.be  
 Department of Physics & NANOLab Center of Excellence, University of Antwerp,  
 Groenenborgerlaan 171, B-2020 Antwerp, Belgium  
 Department of Mechanical Engineering, Faculty of Engineering, Eskisehir Technical  
 University, 26555 Eskisehir, Turkey

**Jonas Bekaert**

E-mail: jonas.bekaert@uantwerpen.be  
 Department of Physics & NANOLab Center of Excellence, University of Antwerp,  
 Groenenborgerlaan 171, B-2020 Antwerp, Belgium

**Milorad V. Milošević**

E-mail: milorad.milosevic@uantwerpen.be  
 Department of Physics & NANOLab Center of Excellence, University of Antwerp,  
 Groenenborgerlaan 171, B-2020 Antwerp, Belgium

### Bulk Nb<sub>2</sub>CCl<sub>2</sub> structures with *P6<sub>3</sub>mmc* and *P-3m1* symmetries

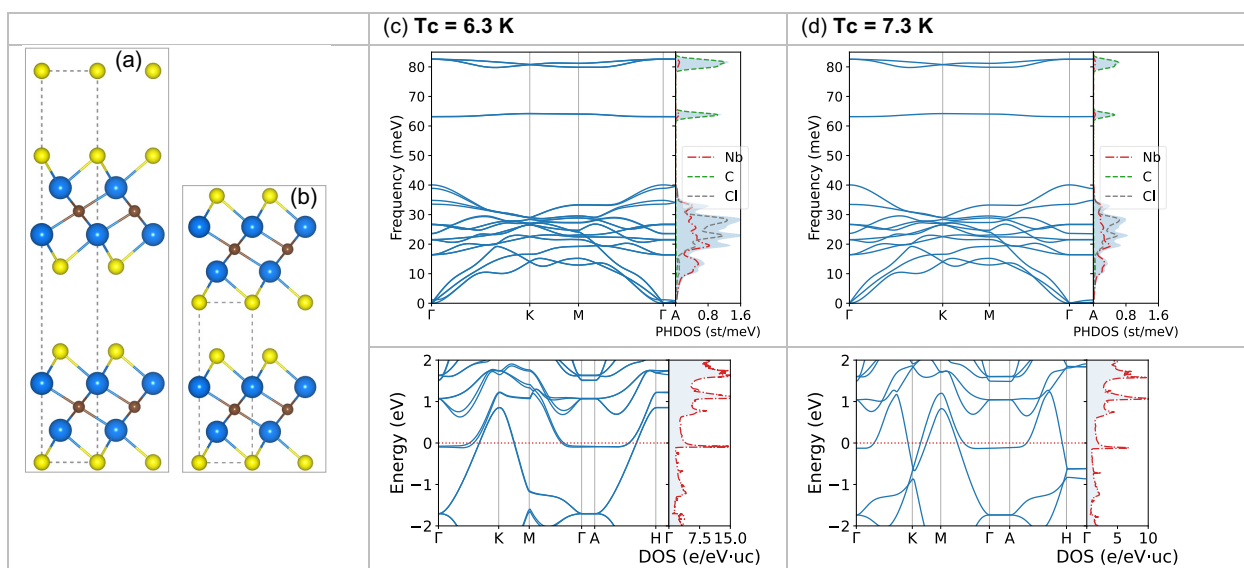

**Figure S1:** (a) Schematic representation of the periodic unit-cell of the Nb<sub>2</sub>CCl<sub>2</sub> crystals with space group symmetries (a) *P6<sub>3</sub>mmc* and (b) *P-3m1*. The calculated phonon dispersion along with phonon density of states, and electronic band structures of Nb<sub>2</sub>CCl<sub>2</sub> crystals with space group symmetries (c) *P6<sub>3</sub>mmc* and (d) *P-3m1*.

### Exfoliation energies ( $E_x$ )

$$E_x = (E_{\text{Bulk}} - n \cdot E_{2\text{D}}) / N$$

$E_{\text{Bulk}}$  = Total energy of the bulk structure

$E_{2\text{D}}$  = Total energy of the single layer

$n$  = Number of layers in the bulk unit cell

$N$  = Number of atoms in the unit cell of the bulk structure

Note: Total energies were obtained using the PBE functional, without the inclusion of vdW interactions.

| Materials                                      | $E_x$ (meV/Atom) |
|------------------------------------------------|------------------|
| Nb <sub>2</sub> CS <sub>2</sub>                | -1.08            |
| Nb <sub>2</sub> CCl <sub>2</sub>               | -1.03            |
| Nb <sub>3</sub> C <sub>2</sub> S <sub>2</sub>  | -0.53            |
| Nb <sub>3</sub> C <sub>2</sub> Cl <sub>2</sub> | -0.52            |

## Monolayer Nb<sub>2</sub>CCl<sub>2</sub>

### Superconducting properties

$t\text{smear} = 0.0075$  Ha  $\mu^* = 0.13$  Tc = 9.6 K

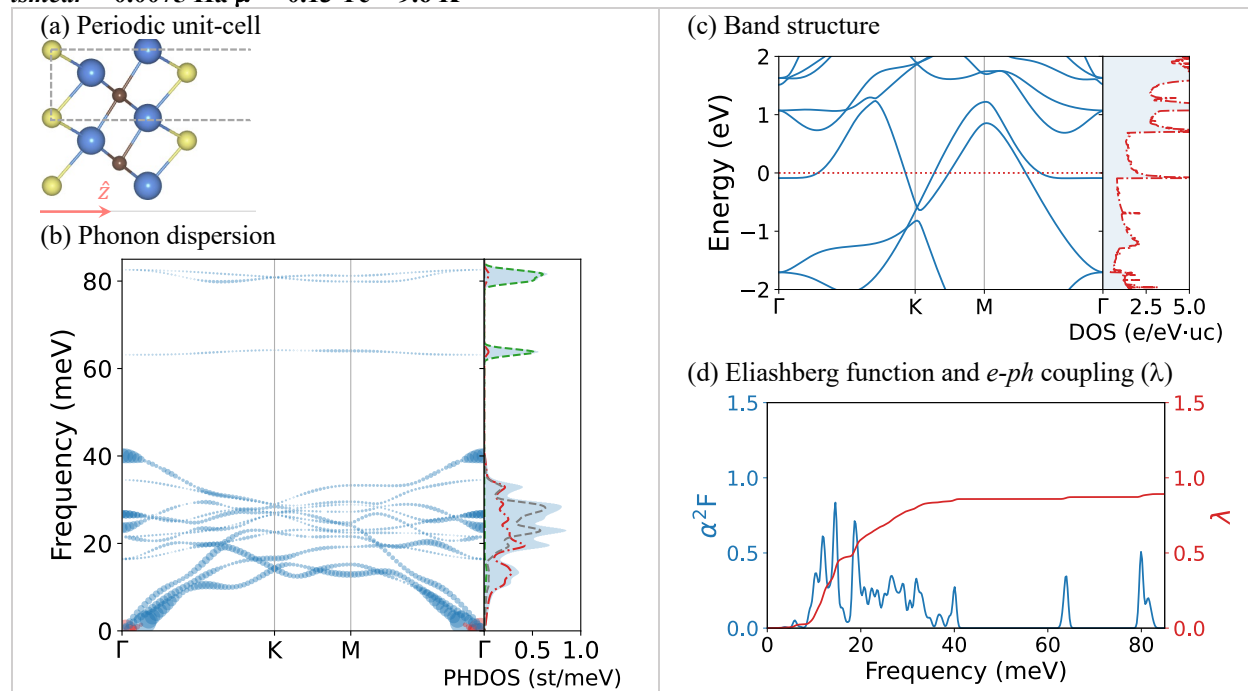

**Figure S2:** (a) Schematic representation of the periodic unit-cell of the considered crystal. The calculated (b) phonon dispersion along with  $e$ - $ph$  coupling (size of red circles) and phonon density of states, (c) electronic band structure, and (d) Eliashberg function and integrated  $e$ - $ph$  coupling constant ( $\lambda$ ). The size of red circles is scaled with 1/100 for a better view. Here the red, grey, and green lines correspond to the Nb, Cl, and S atoms, respectively.

## Monolayer Nb<sub>2</sub>CCl<sub>2</sub>

### The Fermi level dependent superconducting properties of monolayer Nb<sub>2</sub>CCl<sub>2</sub>

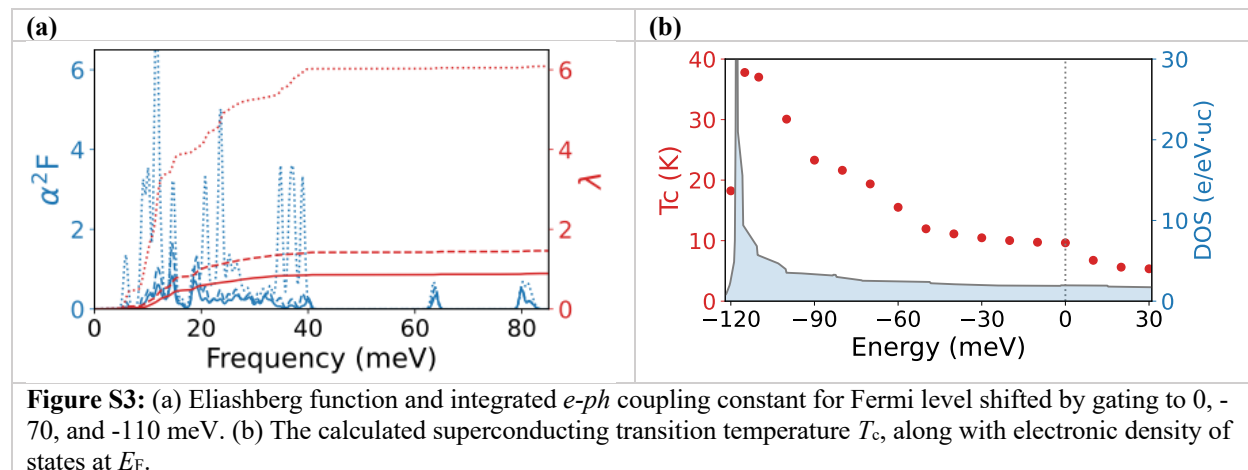

**Figure S3:** (a) Eliashberg function and integrated  $e$ - $ph$  coupling constant for Fermi level shifted by gating to 0, -70, and -110 meV. (b) The calculated superconducting transition temperature  $T_c$ , along with electronic density of states at  $E_F$ .

## Bulk-layered Nb<sub>2</sub>CS<sub>2</sub>

The calculated nesting function

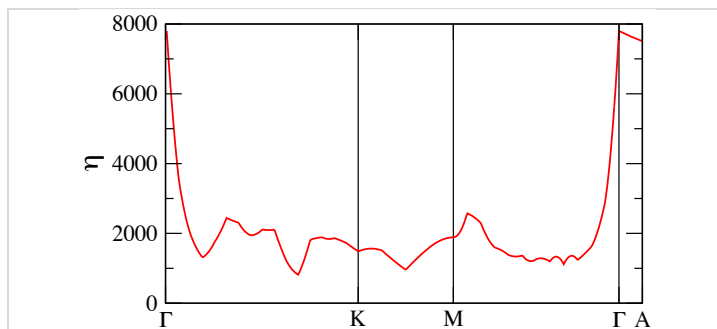

**Figure S4:** The calculated nesting function for Nb<sub>2</sub>CS<sub>2</sub> (bulk).

## Monolayer Nb<sub>2</sub>CS<sub>2</sub>

The change in Eliashberg function and integrated e-ph coupling constant ( $\lambda$ ) with applied strain

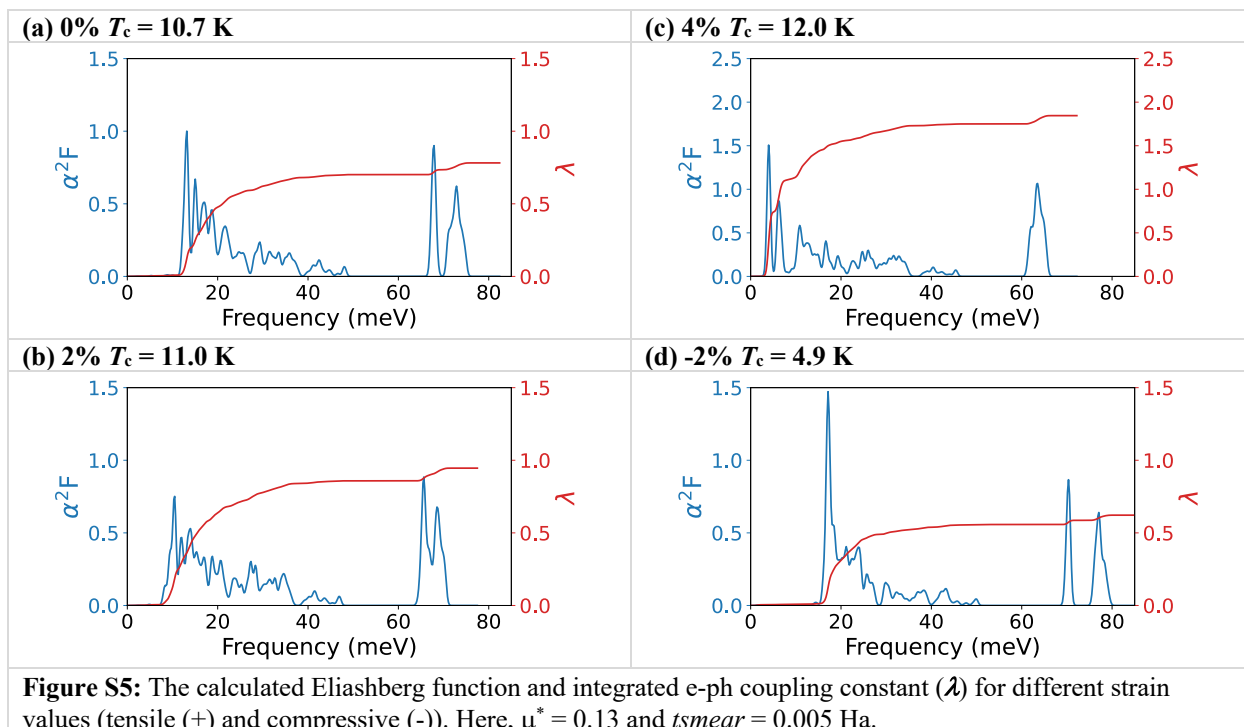

**Figure S5:** The calculated Eliashberg function and integrated e-ph coupling constant ( $\lambda$ ) for different strain values (tensile (+) and compressive (-)). Here,  $\mu^* = 0.13$  and  $tsmear = 0.005$  Ha.

Bulk Nb<sub>2</sub>CSe<sub>2</sub>

## Superconducting properties

 $t\text{smear} = 0.0015 \text{ Ha } T_c = 0.0 \text{ K}$ 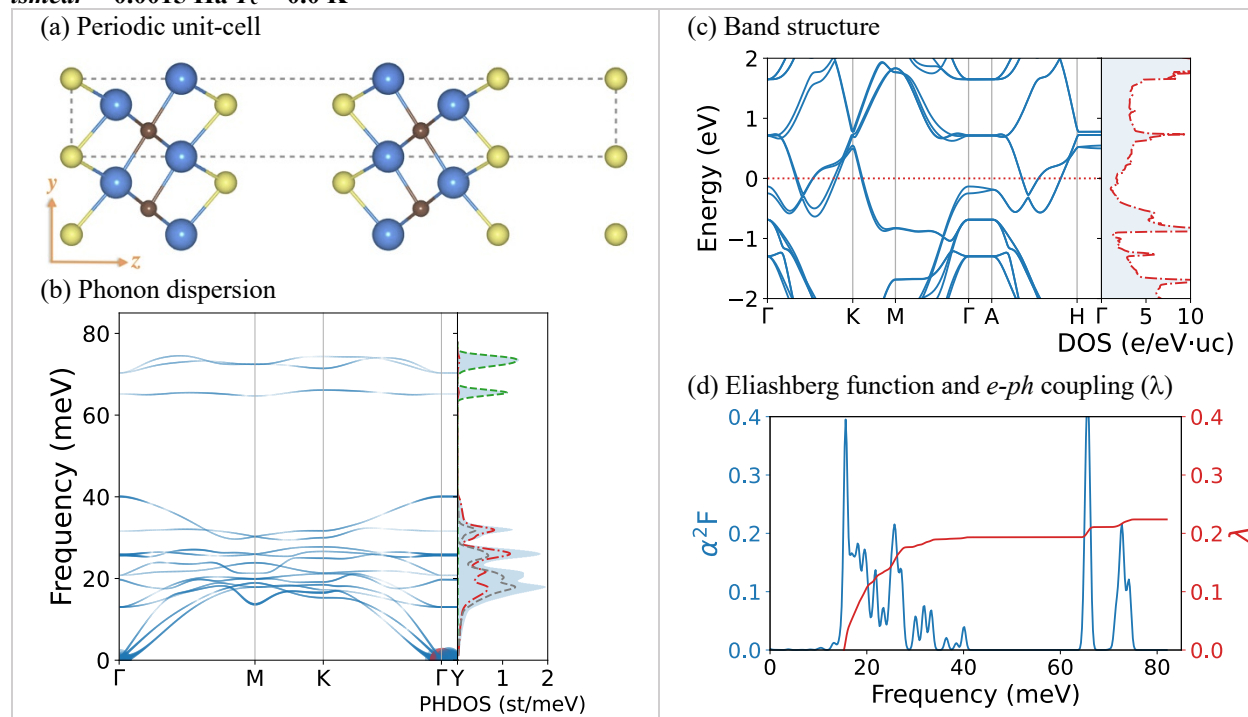

**Figure S6:** (a) Schematic representation of the periodic unit-cell of the considered crystal. The calculated (b) phonon dispersion along with  $e$ - $ph$  coupling (size of red circles) and phonon density of states, (c) electronic band structure, and (d) Eliashberg function and integrated  $e$ - $ph$  coupling constant ( $\lambda$ ). The size of red circles is scaled with 1/100 for a better view. Here the red, grey and green lines correspond to the Nb, Se, and C atoms, respectively.

Monolayer Nb<sub>3</sub>C<sub>2</sub>

## Superconducting properties

 $t\text{smear} = 0.010 \text{ Ha } T_c = 1.0 \text{ K}$ 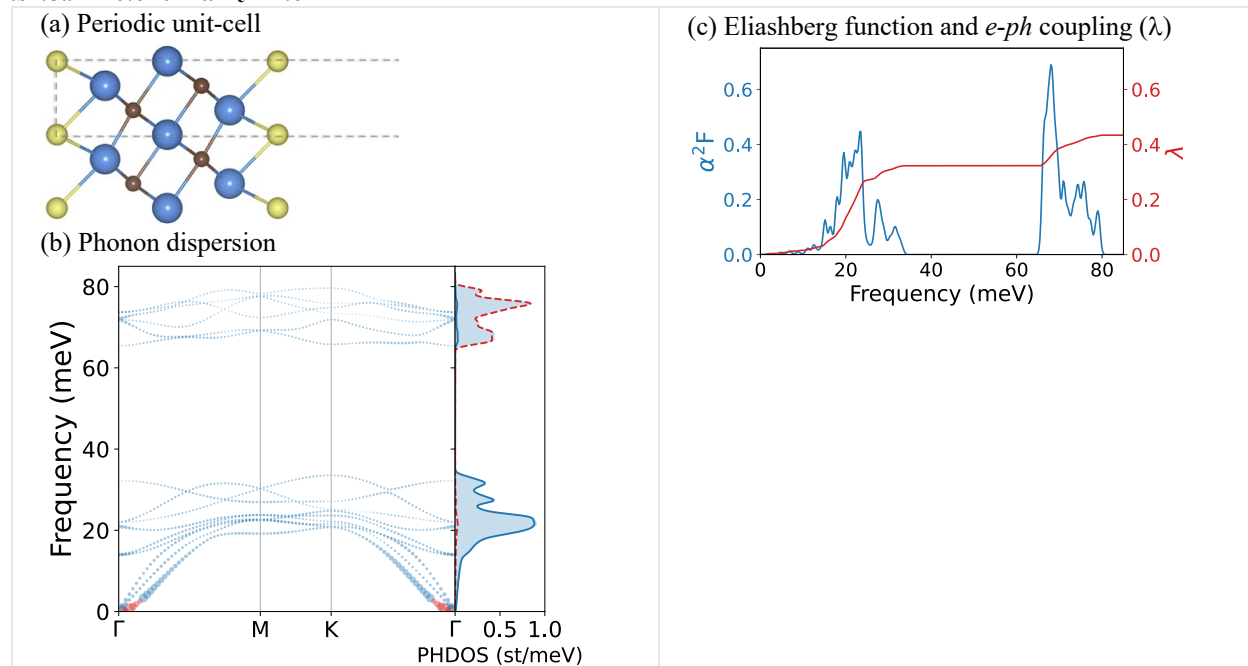

**Figure S7:** (a) Schematic representation of the periodic unit-cell of the considered crystal. The calculated (b) phonon dispersion along with  $e$ - $ph$  coupling (size of red circles) and phonon density of states, and (c) Eliashberg function and integrated  $e$ - $ph$  coupling constant ( $\lambda$ ). The size of red circles is scaled with 1/100 for a better view. Here the blue, and red lines correspond to the Nb, and C atoms.

**Bulk Nb<sub>3</sub>C<sub>2</sub>Cl<sub>2</sub>**  
Space group *P-3m1*

**Phonon dispersion**

*tsmear* = 0.0075 Ha

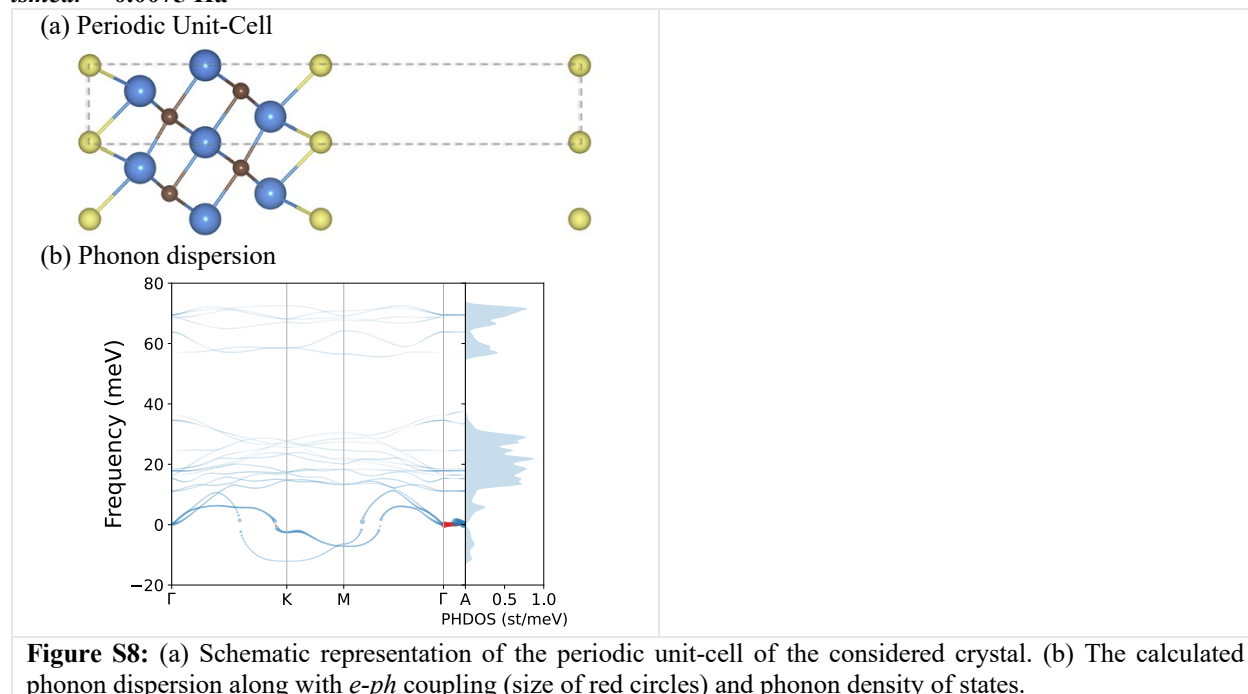

**Figure S8:** (a) Schematic representation of the periodic unit-cell of the considered crystal. (b) The calculated phonon dispersion along with *e-ph* coupling (size of red circles) and phonon density of states.

**Monolayer Nb<sub>3</sub>C<sub>2</sub>S<sub>2</sub>**

**Superconducting properties**

*tsmear* = 0.0050 Ha *T<sub>c</sub>* = 28.1 K

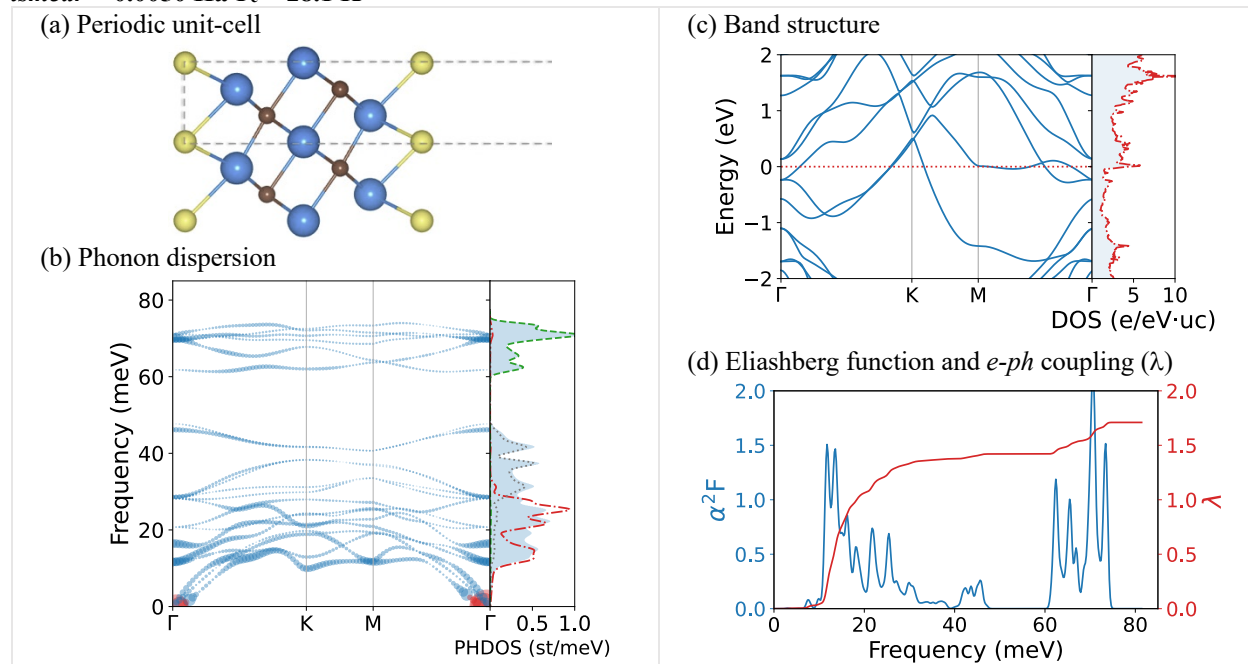

**Figure S9:** (a) Schematic representation of the periodic unit-cell of the considered crystal. The calculated (b) phonon dispersion along with *e-ph* coupling (size of red circles) and phonon density of states, (c) electronic band structure, and (d) Eliashberg function and integrated *e-ph* coupling constant ( $\lambda$ ). The size of red circles is scaled with 1/10 for a better view. Here the red, grey and green lines correspond to the Nb, S, and C atoms, respectively.

### Bulk Nb<sub>2</sub>CCl<sub>2</sub>

*The calculated electronic density of states and carrier doping level*

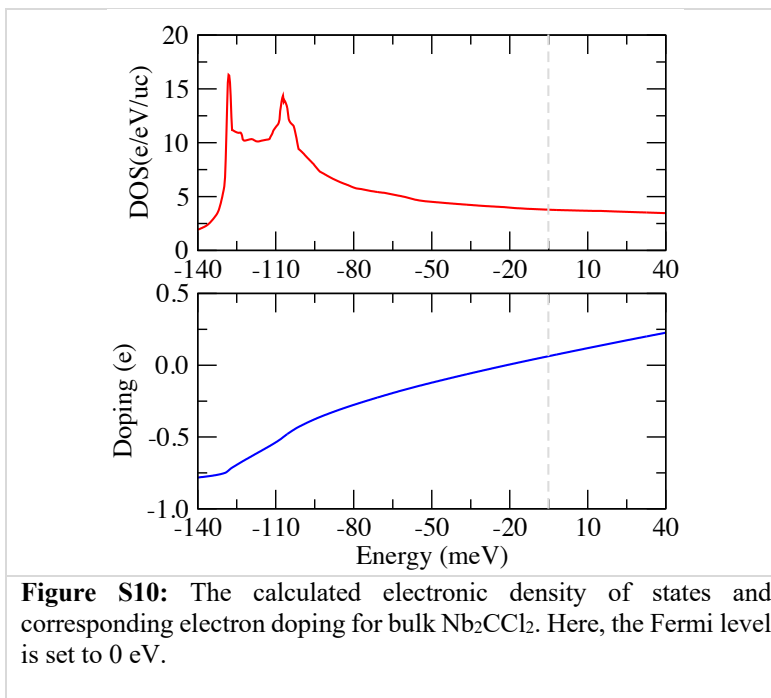

### Monolayer Nb<sub>2</sub>CCl<sub>2</sub>

*The calculated electronic density of states and carrier doping level*

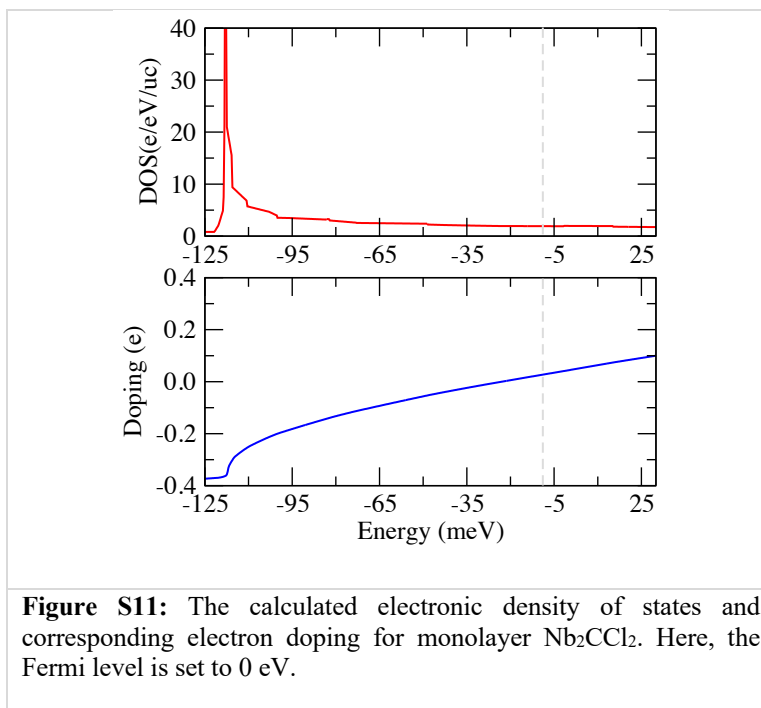

Monolayer Nb<sub>2</sub>CCl<sub>2</sub>*The change in band structure with tensile strain*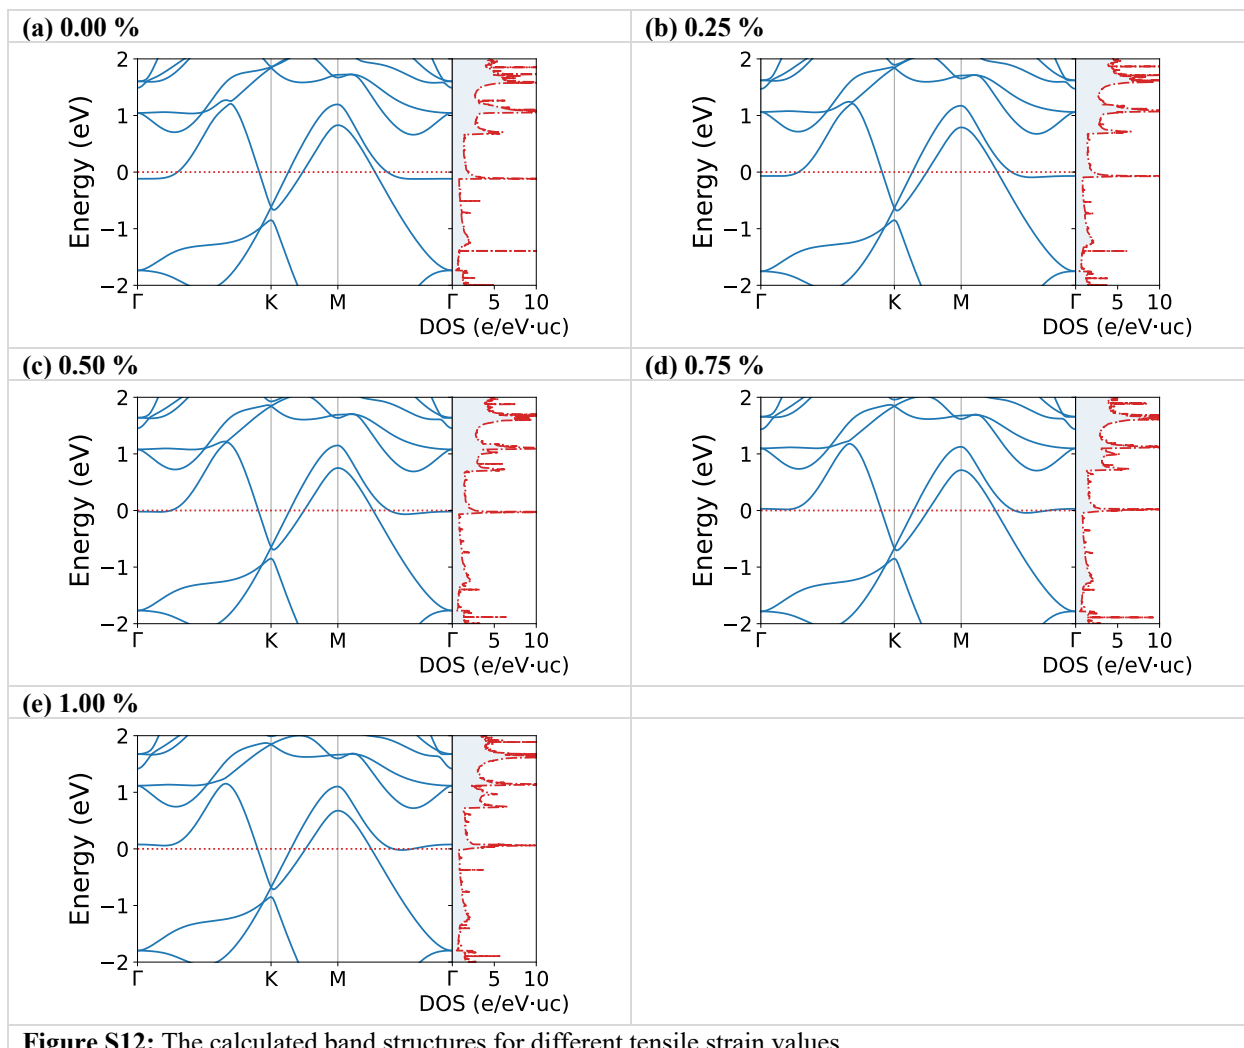**Figure S12:** The calculated band structures for different tensile strain values.

### Monolayer Nb<sub>2</sub>CCl<sub>2</sub>

The change in Eliashberg function and integrated e-ph coupling constant ( $\lambda$ ) with tensile strain

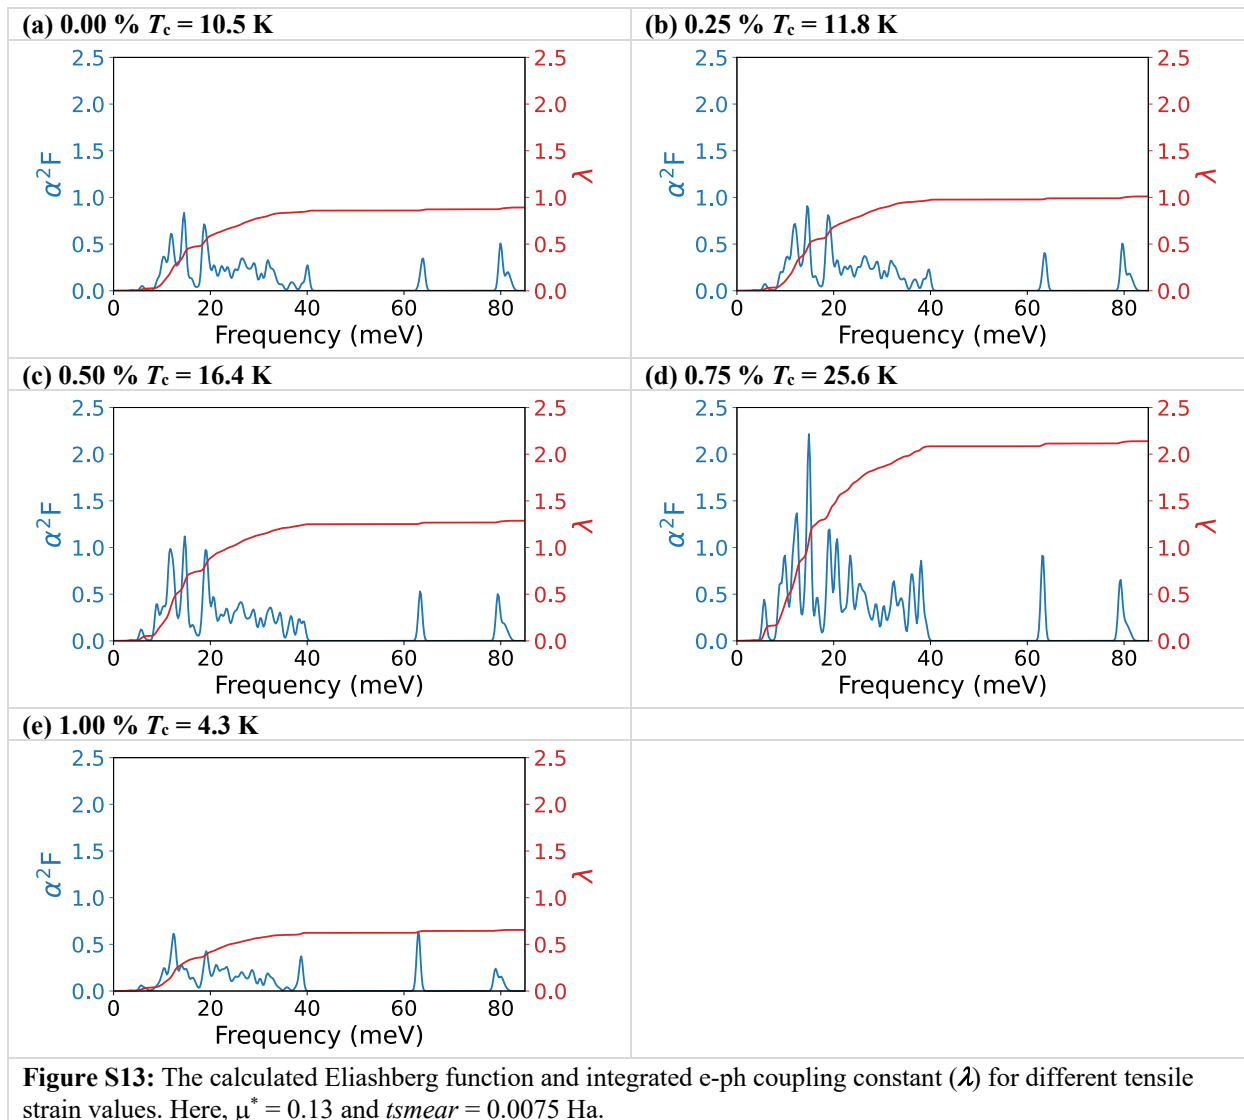



## Monolayer Nb<sub>2</sub>CCl<sub>2</sub>

*The change in phonon dispersion with tensile strain*

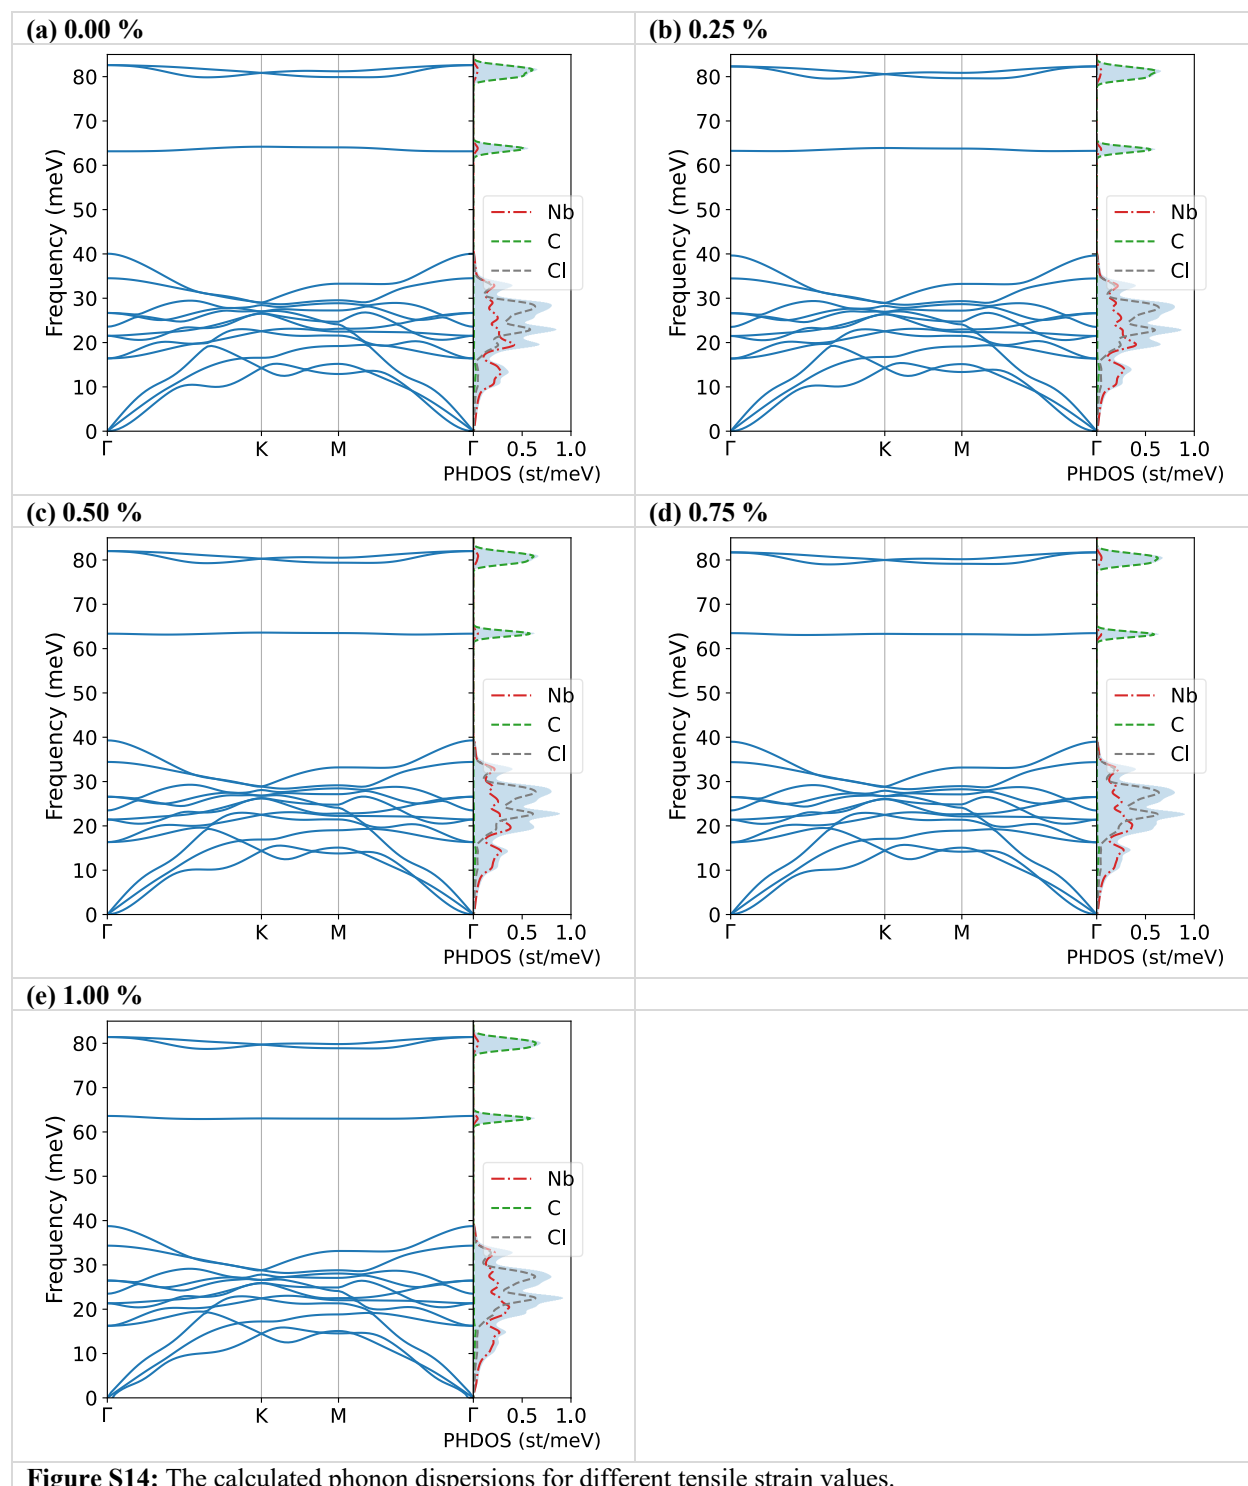

**Figure S14:** The calculated phonon dispersions for different tensile strain values.

## Monolayer Nb<sub>2</sub>CS<sub>2</sub>

### Superconducting properties

$t\text{smear} = 0.0015$  Ha  $T_c = 10.7$  K

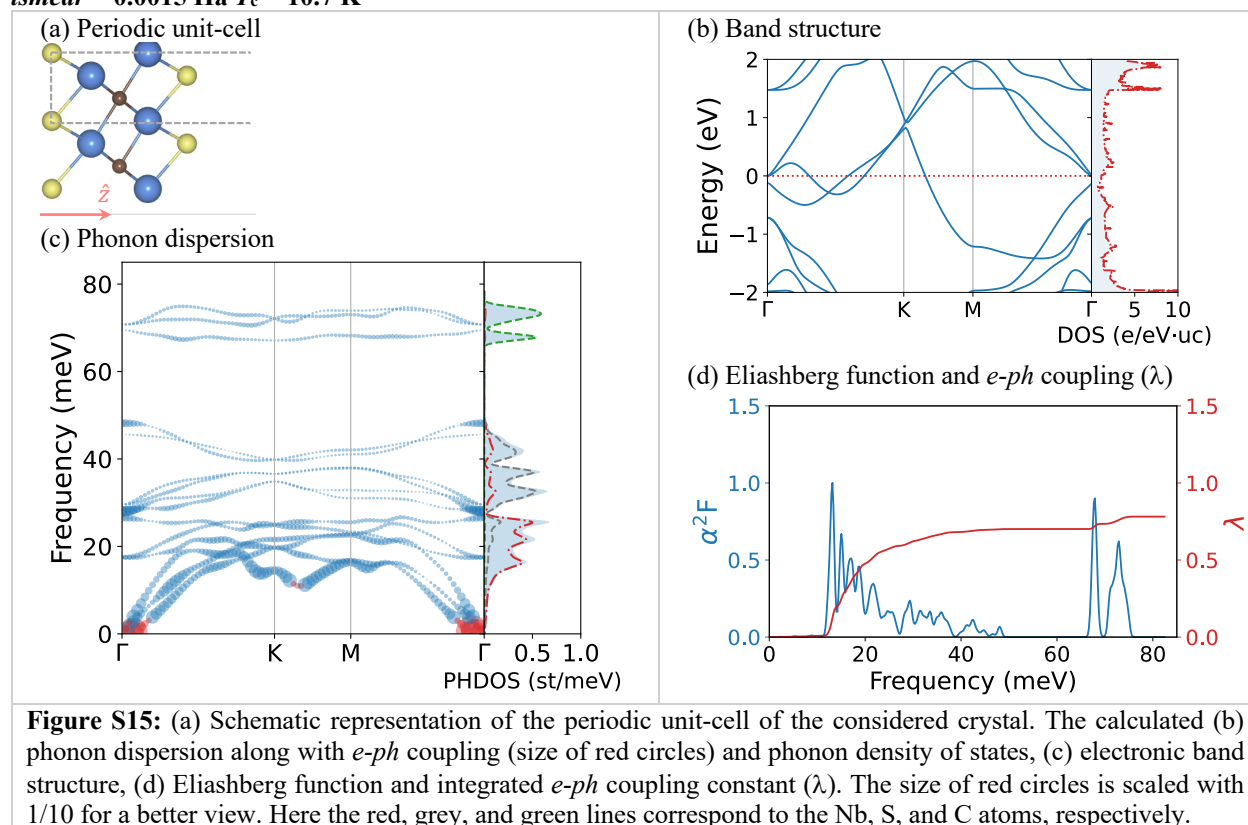

## Monolayer Nb<sub>2</sub>CS<sub>2</sub>

### The change in band structure with applied strain

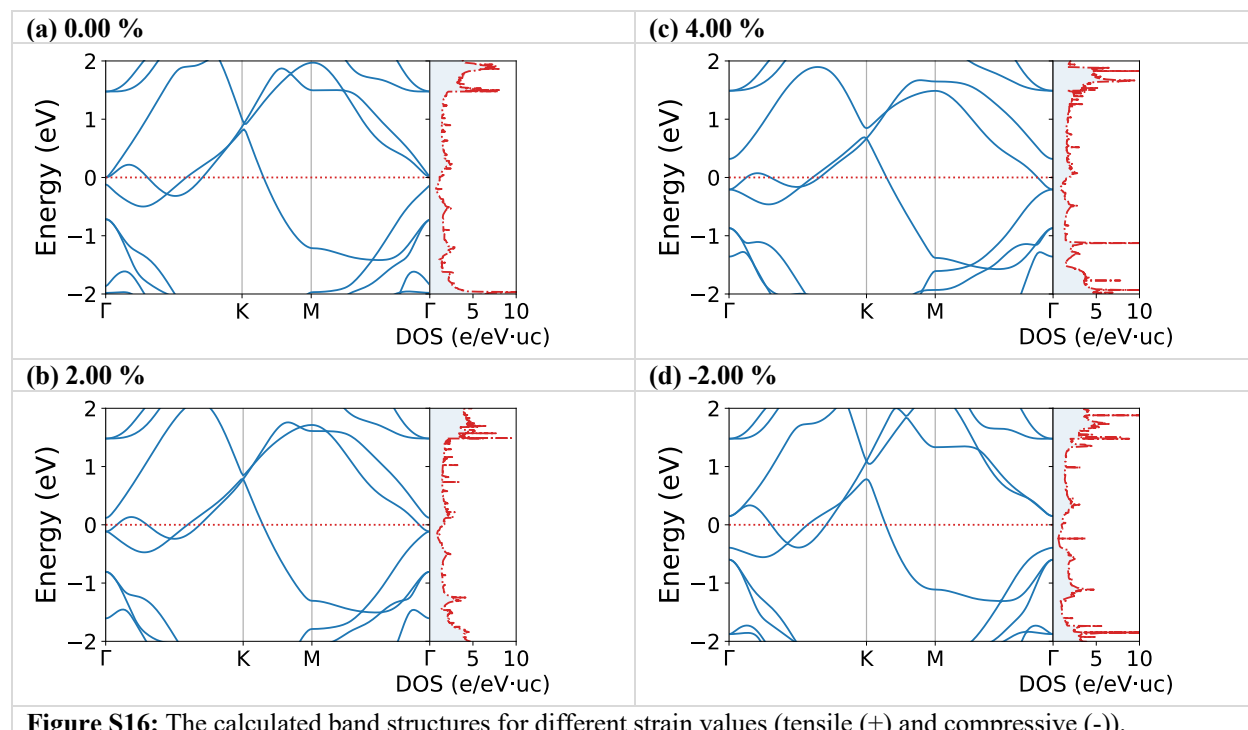

## Monolayer Nb<sub>2</sub>CS<sub>2</sub>

### The change in phonon dispersion with applied strain

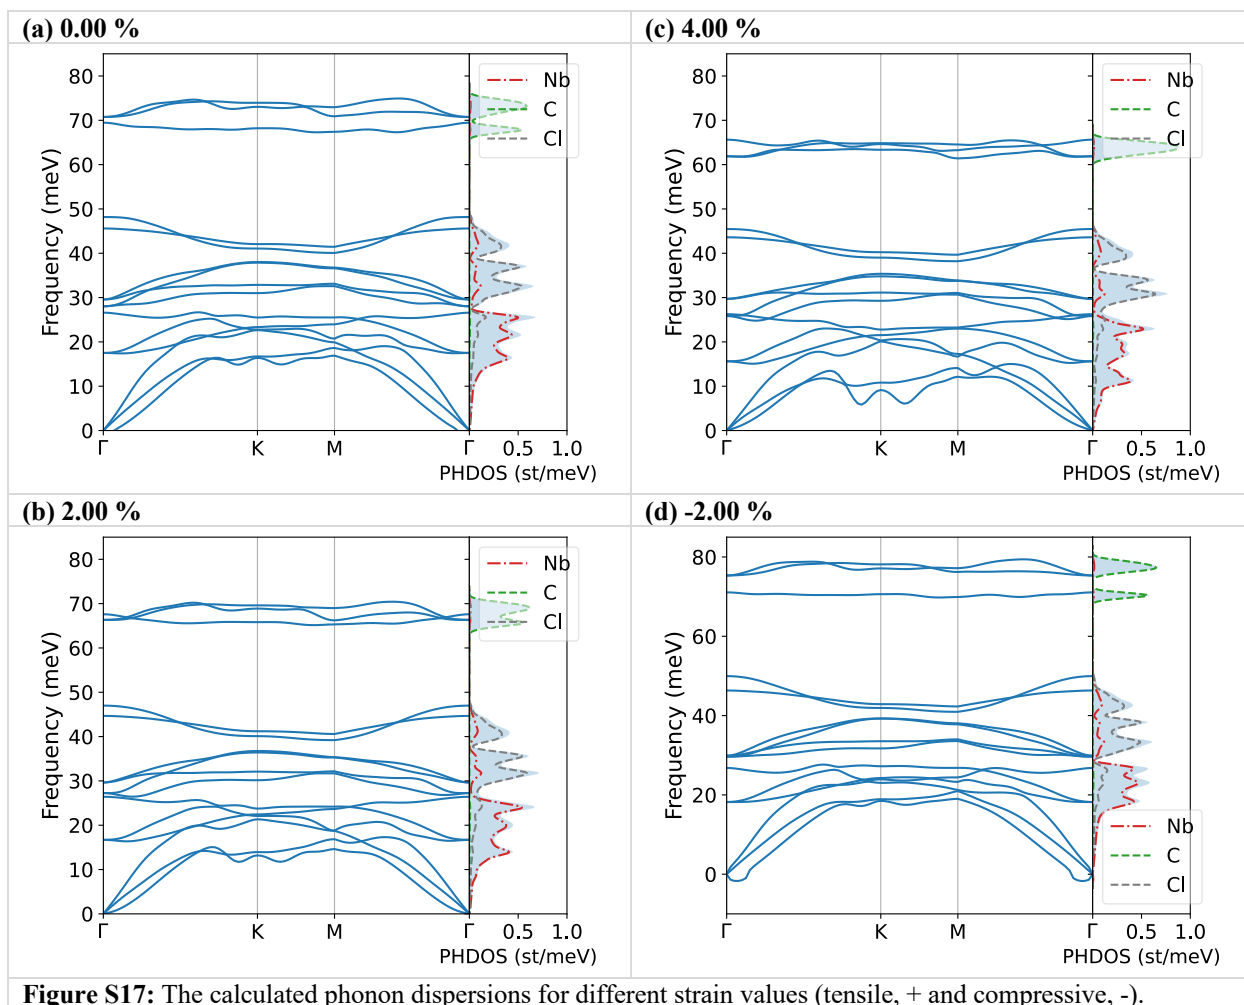

**Figure S17:** The calculated phonon dispersions for different strain values (tensile, + and compressive, -).

## Monolayer Nb<sub>2</sub>CS<sub>2</sub>

### The calculated nesting function

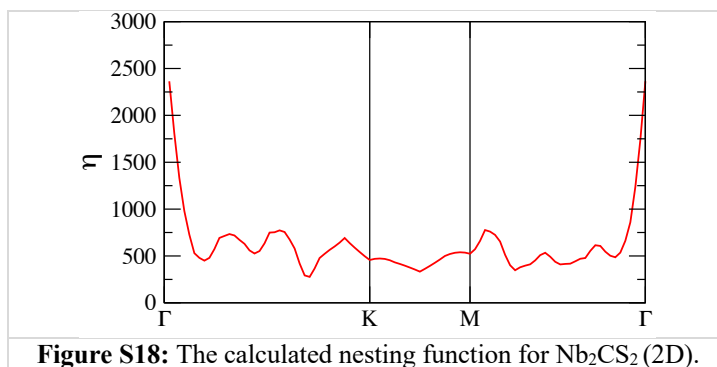

**Figure S18:** The calculated nesting function for Nb<sub>2</sub>CS<sub>2</sub> (2D).
